# Supplementary material
Source: publisher site journal article supplement (https://www.dovepress.com/get_supplementary_file.php?f=466268.docx)
Supplement: Supplementary file 1 [file get_supplementary_file.php]

**Supplementary** **Information**

**Near infrared -activatable Biomimetic Nanoplatform for Tumor-specific Drug Release, Penetration and Chemo-photothermal Synergistic Therapy of Orthotopic Glioblastoma**

Ming Li1*
Xinrui Zhang1*
Yujie Zhou1
Yuteng Chu1
Jie Shen1
Yue Cai1
Xuanrong Sun1

1Author affiliations: Collaborative Innovation Center of Yangtze River Delta Region Green Pharmaceuticals, Zhejiang University of Technology, Hangzhou 310014, China;

*: These authors contributed equally to this work.

Correspondence：Xuanrong Sun，Collaborative Innovation Center of Yangtze River Delta Region Green Pharmaceuticals, Zhejiang University of Technology, Hangzhou 310014, China，E-mail：[sunxr@zjut.edu.cn](mailto:sunxr@zjut.edu.cn)

**Figure S1.** The absorption spectra of ICG and AM-NP

**Figure S2.** (A) HPLC method for determining the standard curve of SN38. Chromatographic column: C18 reverse phase column ODS-3, 5 μm, 4.6×250 mm; mobile phase: acetonitrile:water = 60:40 (V/V); flow rate: 1 mL/min; detection wavelength: 360 nm; column temperature: 35°C; injection volume: 20 μL. (B) ICG standard curve was determined by measuring OD values at 780 nm.

**Figure S3.** Protein concentration standard curve

**Figure S4.** Tem image of NP after laser exposure for 5 min. scale bar: 500 nm.

**Figure S5.** Stability of AM-NP Charges (A) and TEM Variations (B) scale bar:100 µm

**Figure S6.** The cellular fluorescence uptake images at different incubation times. Scale bar: 100 µm.

**Figure S7.** Cellular fluorescence uptake images with/without Angiopep-2 pretreatment. Scale bar: 100 µm.

**Figure S8.** Fluorescence images of RAW264.7 cells uptaking NP and AM-NP. Scale bar: 100 µm.

**Figure S9.** The in vitro cytotoxicity of SN38.


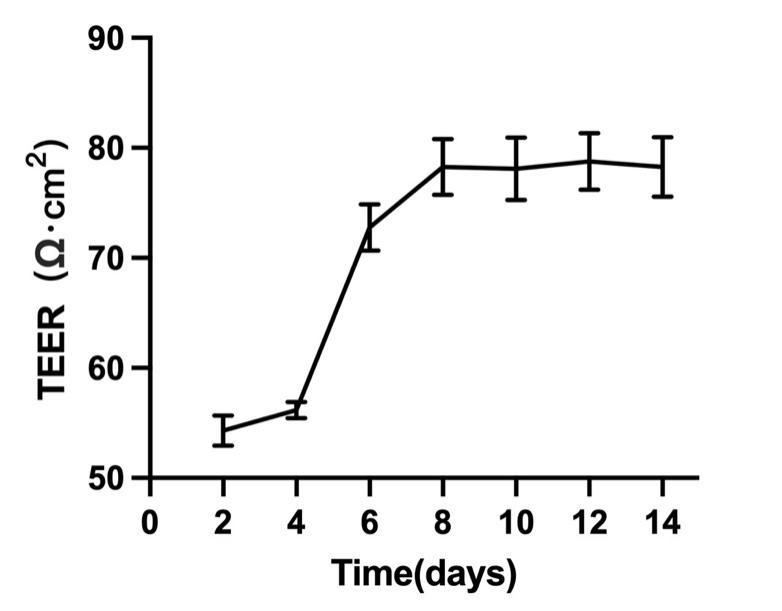


**Figure S10.** The change of the TEER values on the *in vitro* BBB model (n=3).

**Figure S11.** The effects of three phagocytosis inhibitors on the ingestion of AM-NP by bEnd.3 cells.

**Figure S12.** Subcellular distribution of AM-NP observed on bEnd.3 cells using laser confocal microscopy. scale bar: 30 µm


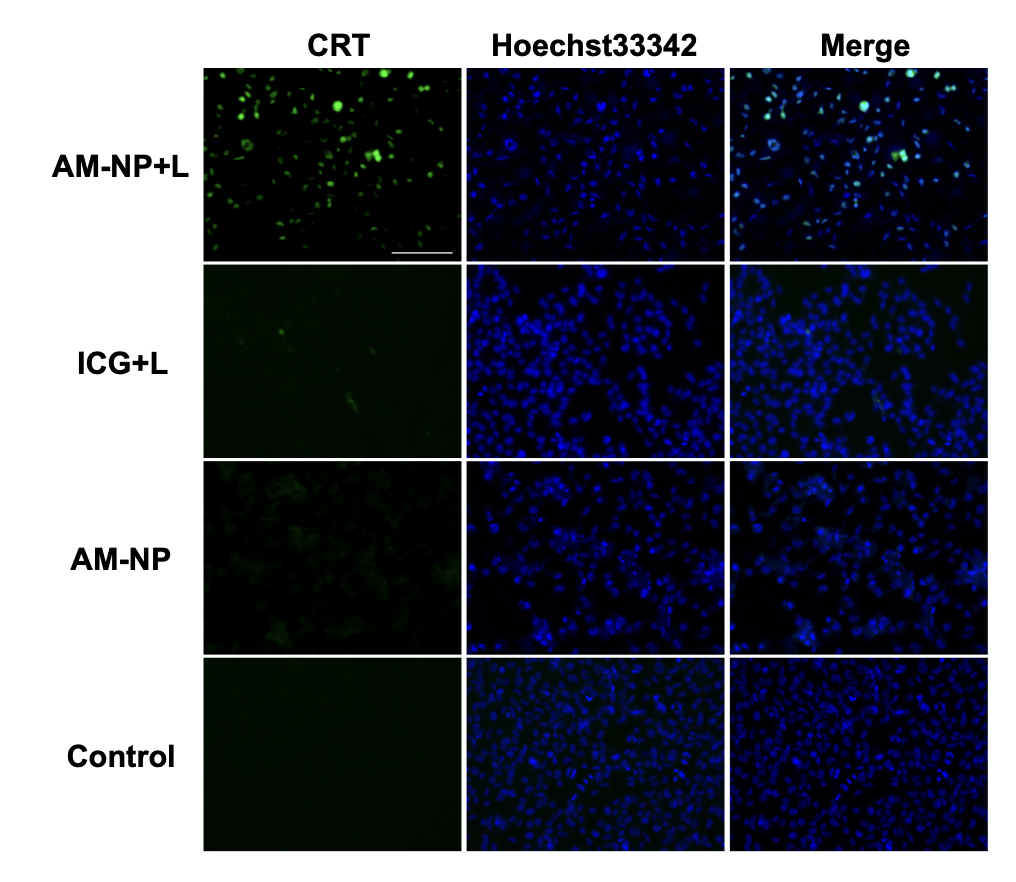


**Figure S13.** CRT distribution on the surface of GL261 tumor cells post AM-NP treatment and laser irradiation (photodensity of 1.0 W cm-2, 5 min)

**Figure S14.** The ATP secretion under different treatments (**p < 0.01, ***p < 0.001)

**Figure S15.** The condition of brain tumors on the tenth day.

**Figure S16.** Images of TUNEL staining in normal brain tissue.
